# Supplementary material
Source: ML conference proceedings conference paper supplement (https://openreview.net/forum?id=W-agFo22-TS)
Supplement: supplementary_material [file attachment]

---

# TestRank: Bringing Order into Unlabeled Test Instances for Deep Learning Tasks

---

Anonymous Author(s)

Affiliation

Address

email

## Abstract

1 Deep learning (DL) systems are notoriously difficult to test and debug due to  
2 the lack of correctness proof and the huge test input space to cover. Given the  
3 ubiquitous unlabeled test data and high labeling cost, in this paper, we propose  
4 a novel test prioritization technique, namely *TestRank*, which aims at revealing  
5 more model failures with less labeling effort. TestRank brings order into the  
6 unlabeled test data according to their likelihood of being a failure, i.e., their *failure-*  
7 *revealing capabilities*. Different from existing solutions, TestRank leverages both  
8 *intrinsic* and *contextual* attributes of the unlabeled test data when prioritizing  
9 them. To be specific, we first build a similarity graph on both unlabeled test  
10 samples and labeled samples (e.g., training or previously labeled test samples).  
11 Then, we conduct graph-based semi-supervised learning to extract contextual  
12 features from the correctness of similar labeled samples. For a particular test  
13 instance, the contextual features extracted with the graph neural network and the  
14 intrinsic features obtained with the DL model itself are combined to predict its  
15 failure-revealing capability. Finally, TestRank prioritizes unlabeled test inputs in  
16 descending order of the above probability value. We evaluate TestRank on three  
17 popular image classification datasets, and results show that TestRank significantly  
18 outperforms existing test prioritization techniques.

## 19 1 Introduction

20 Deep learning (DL) systems are prone to errors due to many factors, such as the biased train-  
21 ing/validation dataset, the limitations of the model architecture, and the constraints on training cost.  
22 Needless to say, it is essential to conduct high-quality testing before DL models are deployed in the  
23 field; otherwise, the behaviors of DL models can be unpredictable and result in severe accidents after  
24 deployment. However, the cost of building test oracles (i.e., the ground-truth output) by manually  
25 labeling a massive set of test instances is prohibitive, especially for tasks requiring experts for accurate  
26 labeling, such as medical images and malware executables.

27 To tackle the above problem, various test prioritization techniques [6, 2, 20] are proposed to identify  
28 ‘high-quality’ test instances from a large amount of unlabeled data, which facilitates revealing more  
29 failures (e.g., misclassification) of the DL model with reasonable labeling effort. These methods try to  
30 derive the failure-revealing capability of a test instance with its *intrinsic attributes* extracted from the  
31 responses of the model under test (e.g., the softmax-based probabilities given by the target DL model  
32 to this specific input). DeepGini [6] feeds the unlabeled data to the target DL model and calculates  
33 confidence-related scores based on the model’s output probabilities to rank the unlabeled test cases.  
34 Test cases with nearly equal probabilities on all output classes are regarded as less confident ones and  
35 are likely to reveal model failures. Similarly, Byun *et. al.* use the uncertainty score obtained from  
36 MC-Dropout for test input prioritization [2]. Multiple-boundary clustering and prioritization (MCP)

[20] considers both the output probabilities and the balance among each classification boundary when selecting test cases. All existing works try to identify instances near the decision boundary and prioritize them. However, we argue that near-boundary instances are not necessarily failures, especially for well-trained classifiers with high accuracy. Also, as failures can be far from the decision boundary, existing methods could fail to reveal these remote failures.

To estimate a test instance’s capability in revealing failures, in addition to the intrinsic attributes mentioned above, there is another type of information that provides extra insight into the target model’s behavior: the known classification correctness of labeled samples (i.e., training samples and previously tested samples) and their relationship to the unlabeled instance. Such data is already known and it provides *contextual information* that reflects the corresponding inference behaviors of the target model for a set of similar instances.

In this work, we present a novel test prioritization technique, namely *TestRank*, for DL classifiers. TestRank exploits both intrinsic and contextual attributes of test instances to evaluate their failure-revealing capabilities. Based on the intuition that similar inputs are usually associated with the same classification results, we propose to use graph neural networks (GNNs) [14] to summarize the neighboring classification correctness for each unlabeled instance into contextual attributes. GNNs have been well-studied and valued for their relational inductive bias for extracting graph information. Our method, TestRank, constructs a similarity graph on both unlabeled and labeled instances and apply the semi-supervised GNN learning to extract the contextual attributes. After that, we aggregate intrinsic (such attributes are extracted from the input samples without considering their neighbors) and contextual attributes with a neural-network-based binary classifier for test prioritization.

The contributions of our work are as follows:

- To the best of our knowledge, *TestRank* is the first work that takes the contextual information from the target DL model into consideration for test input prioritization.
- We propose to construct a similarity graph on both labeled and unlabeled samples, and train a graph neural network to extract useful contextual attributes from the contextual information for these unlabeled instances. We also present approximation techniques to reduce its computational complexity with minor impact on the performance of *TestRank*.
- We propose a simple yet effective neural network that combines the intrinsic attributes and contextual attributes of unlabeled test instances for their failure-revealing capability estimation.

We empirically evaluate *TestRank* on three popular image classification benchmarks: CIFAR-10, SVHN, and STL10. The results show that our method outperforms the state-of-the-art methods by a considerable margin.

## 2 Test Prioritization and Prior Works

Let us use  $f : \mathcal{X} \rightarrow \mathcal{Y}$  to represent the given target DL model, where  $\mathcal{X}$  and  $\mathcal{Y}$  are the input and output space, respectively. For effective testing, the debugging center must do test prioritization from a large unlabeled dataset, i.e., select a certain number of test instances from the unlabeled test instance pool that can reveal model failures as many as possible. Later, these failures can be fed back to the training center for repairing or failure analysis. We define the model failures as follows:

**Definition 1. DL Model Failure.** A failure of the DL model can be uncovered by the test instance  $\mathbf{x}$  if the predicted label  $f(\mathbf{x})$  is inconsistent with its ground truth label  $y_{\mathbf{x}}$ , namely  $f(\mathbf{x}) \neq y_{\mathbf{x}}$ .

Formally, the debugging center selects and labels  $b$  test cases  $\mathbf{X}_S$  ( $|\mathbf{X}_S| = b$ ) from the unlabeled test instance pool  $\mathbf{X}_U$ . The objective of test prioritization is to maximize the detected failures:

$$\max |\{\mathbf{x} | f(\mathbf{x}) \neq y_{\mathbf{x}}\}|, \text{ where } \mathbf{x} \in \mathbf{X}_S \text{ and } |\mathbf{X}_S| = b. \quad (1)$$

Different solutions are proposed to quantify the failure-revealing capability of unlabeled instances. DeepGini [6] proposes to evaluate a single test instance via the DL model’s final statistical output:

$$f(t) = 1 - \sum_{i=1}^N p_{t,i}^2, \quad (2)$$

where  $p_{t,i}$  is the predicted probability that the test case  $t$  belongs to the class  $i$ . Given the sum of  $p_{t,i}$  is 1, impurity function  $f(t)$  is maximal when all  $p_{t,i}$  values are equal. This method tends to

select data with high impurity value. Instead of evaluating the overall likelihood of failure for all classes, Multiple-Boundary Clustering and Prioritization (MCP) proposes to evaluate it for each pair of classes individually [20]. In this way, test instances can be evenly selected for each class pair and the failure cases are investigated at the finer granularity. Besides these metrics, Byun *et. al.* also propose to measure the likelihood of incorrect prediction by the uncertainty of the model’s output [2], which reflects the degree to which a model is uncertain about its prediction. In practice, evaluating uncertainty requires the task DL model to be a Bayesian Neural Network [19, 16] or containing a dropout layer for approximation [8].

Besides examining the DL model’s final outputs, Kim *et.al.* proposes two surprise adequacy (SA) criteria that make use of the target DL’s internal outputs (e.g., the activation traces) [12]. They are Likelihood-based Surprise Adequacy Coverage (LSA) and Distance-based Surprise Adequacy Coverage (DSA). LSA and DSA measure the likelihood or distance of an unlabeled instance to the training instances, respectively. Test samples with higher SA values are preferred in testing.

To sum up, all existing methods use the target model’s outputs to one input, i.e., its intrinsic attributes, for its failure-revealing capability estimation. In contrast, we make use of both intrinsic and contextual attributes of an instance for better estimation (see later sections for details).

### 3 TestRank

#### 3.1 Motivation

The failure-revealing capability of an unlabeled test input is closely related to its attributes for the DL model under test. In this work, we distinguish two kinds of attributes for an unlabeled instance: the *intrinsic attributes* and the *contextual attributes*.

We define the *intrinsic attributes* of an input as the output responses assigned by the target DL model to this specific input. It could be, for example, the predictive output distribution of the input from the target DL model, reflecting the *sentiment* derived from the computation performed by the target model [2]. This kind of attributes is adopted by existing test input prioritization approaches [6, 20, 2]. Note that we define such attributes as ‘intrinsic’ because they are extracted from inputs without considering their context, *i.e.*, the classification correctness of its similar instances.

In contrast with the intrinsic attributes, the *contextual attributes* provide a deeper insight into the target model for the unlabeled samples: the contextual attributes for an unlabeled sample summarize the classification correctness of similar and labeled samples. For a particular test instance, such contextual attributes are useful and complementary to the intrinsic attributes.

An illustrative example is shown in Figure 1, wherein we visualize the behavior of a two-class classifier on the unlabeled test data and historically labeled data distribution. The blue region includes the instances that are near the decision boundary. Intuitively, the classifier is uncertain about the data when data is near the decision boundary and is likely to misclassify it. Existing works [20, 6, 2] propose various indicators (*e.g.*, confidence/uncertainty/surprise scores) to help identify the near-boundary instances. However, the near-boundary instances are not necessarily failures, and some of them can be correctly classified by a well-trained classifier. What is worse, such testing approaches fail to capture the failures lying far from the decision boundary (*i.e.*, remote failures, shown in the red region in Figure 1), because DL models usually output high confidence (or low uncertainty) for these inputs. These failures may be caused by limited model capacity, insufficient training data, etc.

Our key insight is that we can use the contextual information (*e.g.* the classification correctness of similar labeled samples) to help locate both near-boundary and remote failures. The usefulness

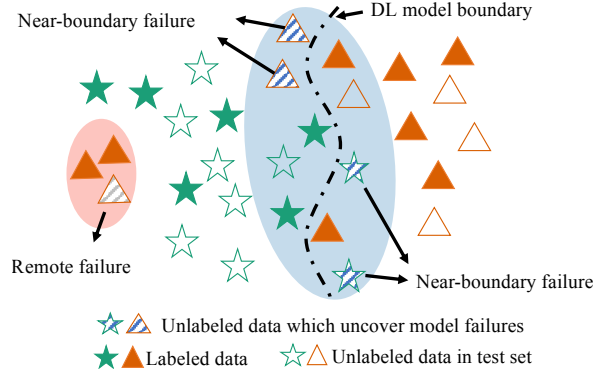

Figure 1: A motivational example.

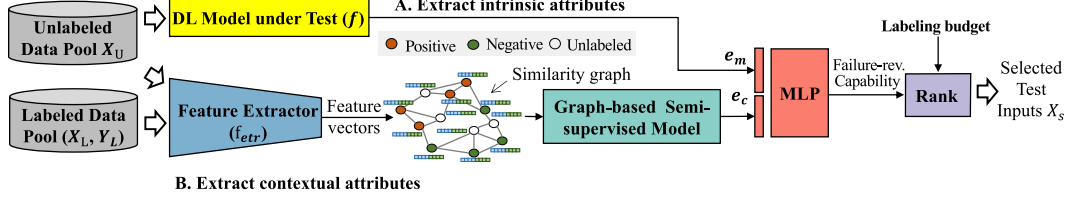

Figure 2: The overview of TestRank.

of the contextual information is due to the local continuity property [1], which means that inputs close in the feature space share similar prediction behavior, e.g., classification results from the target model. As shown in Figure 1, there are some already labeled data, whose classification correctness are already known, surrounding the unlabeled data. If an unlabeled instance is close to already falsely classified data, under the local continuity property, it is likely that this instance is also a model failure. This property motivates us to extract the contextual attributes for an unlabeled instance from its neighboring labeled data. By combining the extracted contextual attributes with the intrinsic attributes, we expect to achieve better failure-revealing capability estimation.

### 3.2 Overview

Figure 2 shows the overview of TestRank, which consists of two attribute extraction paths for the final failure-revealing capability estimation:

1. **Path A: intrinsic attributes extraction.** Given a pool of unlabeled inputs  $\mathbf{X}_U$ , we use the target DL model  $f$  to extract the intrinsic attributes  $\mathbf{e}_m$  for each input. More precisely, we collect the output logits (i.e., vectors before the *softmax* layer) from the DL model as  $\mathbf{e}_m$ .
2. **Path B: contextual attributes extraction.** First, we use a feature extractor to map the original data space into a more compact feature space with good local continuity property. Then, we create a similarity graph (i.e.,  $k$ -Nearest Neighbor Graph) based on the obtained feature vectors and their corresponding classification correctness, if any, from both unlabeled data pool  $\mathbf{X}_U$  and labeled data pool  $\mathbf{X}_L$  (e.g. training set and previously labeled test samples). Last but not least, the graph-based representation learning technique is applied to extract the contextual attributes  $\mathbf{e}_c$  for each unlabeled instance. The details are elaborated in Sec. 3.3.

After attributes  $\mathbf{e}_m$  and  $\mathbf{e}_c$  are extracted, we combine them together via a Multi-Layer Perceptron (MLP) (see Sec. 3.4 for details). The MLP is responsible for predicting the failure-revealing ability for unlabeled test instances. At last, these instances are ranked according to their failure-revealing capability, and the top ones are selected under the given labeling budget.

As intrinsic attributes extraction is straightforward, we discuss the path *B* and how to combine path *A* and *B* in detail in the following subsections.

### 3.3 Contextual Attributes Extraction

We represent the contextual information from the DL model as a set of labeled inputs  $\mathbf{X}_L$  and the corresponding classification correctness  $\mathbf{Y}_L \in \{0, 1\}$ , where correctly classified inputs are labeled as 0 and misclassified ones are labeled as 1. Given the contextual information, our goal is to extract the contextual attributes for each unlabeled test instance  $\mathbf{x} \in \mathbf{X}_U$ . However, extracting contextual attributes from labeled and unlabeled data is a non-trivial task because of the following reasons.

First, it is well-known that the real data, especially image data, usually locates in high-dimensional space, wherein the underlying data distribution will live on complex and non-linear manifold embedded within the high-dimensional space [1]. Therefore, constructing the relationships between different instances is difficult. To address the challenge, we adopt the representation learning process [9, 21, 3, 11], which map the raw data into a compact feature space with better local continuity property, such that inputs close in the feature space share similar classification results. Thus, in the feature space, the proximity between inputs can be measured with simple distance metrics (e.g.,  $L_2$ , cosine).

---

**Algorithm 1: GNN-based Contextual Attributes Extraction**


---

**Input:** Input samples  $\mathbf{X}_U \cup \mathbf{X}_L$ , Correctness of labeled samples  $\mathbf{Y}_L$ , Number of neighbors  $k$ , Feature extractor  $f_{etr}$ , number of GNN layers  $M$ , number of training epochs.

**Output:** Contextual attributes  $\mathbf{E}_c$  for  $\mathbf{X}_U$

- 1  $\bar{\mathbf{X}} = f_{etr}(\mathbf{X}_U \cup \mathbf{X}_L)$  # Extract compact representation;
- 2  $\mathbf{Edge} = knn\_graph(\bar{\mathbf{X}}, k)$ . # KNN Graph construction;
- 3  $\tilde{\mathbf{A}} = \mathbf{Edge} + \mathbf{I}_N$ ,  $\tilde{\mathbf{D}} = \sum_j \tilde{\mathbf{A}}_{i,j}$ ;
- 4  $\mathbf{H}^0 = \bar{\mathbf{X}}$ ;
- 5 **for** *number of training epochs* **do**
- 6     **for**  $l = 0, 1, \dots, M - 1$  **do**
- 7          $\mathbf{H}^{l+1} = \sigma(\tilde{\mathbf{D}}^{-\frac{1}{2}} \tilde{\mathbf{A}} \tilde{\mathbf{D}}^{-\frac{1}{2}} \mathbf{H}^l \Theta^l)$ ,
- 8     **end**
- 9      $loss = \text{CrossEntropyLoss}(\mathbf{H}^M, \mathbf{Y}_L)$ ;
- 10    Update  $\Theta$ ;
- 11 **end**
- 12  $\mathbf{E}_c = \mathbf{H}^{M-1}[\text{index of } \mathbf{X}_U]$  # extract the representation from the  $M - 1_{th}$  GNN layer;
- 13 **return**  $\mathbf{E}_c$ ;

---

179 Second, manually designing protocols to summarize the neighboring classification results is subject  
 180 to the imperfection of local continuity. Namely, the result is easily affected by the noisy data in the  
 181 neighboring space. To solve this challenge, we construct a similarity graph based on the labeled and  
 182 unlabeled data, and then apply the more powerful graph learning technique – graph neural networks  
 183 (GNN) – for contextual attribute extraction.

184 The GNN empowers graph embedding learning, as it employs a learnable aggregation and transform  
 185 procedure [14], which exploits the relational inductive-bias that exhibits in the graph structure. It  
 186 generates a embedding/representation that summarizes the “contextual information” for each input  
 187 sample, making it easier to separate the correct and misclassified inputs. The contextual attributes  
 188 extracted by the graph neural network can then be combined with the intrinsic attributes to conduct  
 189 the better failure-revealing capability estimation (See Sec. 3.4). The contextual attributes extraction  
 190 process is formally depicted by Algorithm 1.

191 **Feature Vector Representation (Line 1).** As the target model is to be tested, its feature extraction  
 192 quality is not guaranteed. Out of this concern, and to make full use of the labeled and unlabeled data,  
 193 we choose to use a out-of-shelf unsupervised model for feature space construction.

194 Among the unsupervised learning techniques, the BYOL [9] explicitly introduces local continuity  
 195 constraint into the learned feature space and shows good results on various downstream tasks.  
 196 Therefore, we train a BYOL model  $f_{etr}$  to extract the features from the raw input images. The data  
 197 used to train the BYOL model includes both labeled and unlabeled data:  $(\mathbf{X}_U \cup \mathbf{X}_L)$ , and the resulting  
 198 feature matrix is denoted as  $\bar{\mathbf{X}}$ . Please note that the feature extractor can be replaced by any other  
 199 well-trained feature extractor with the local continuity property (*e.g.*, SimCLR [3] and MoCo [11]).

200 **Similarity Graph Construction and Approximation (Line 2).** After the extraction of feature  
 201 representation, we use the simple distance metric (*i.e.*, cosine) to measure the similarity between any  
 202 two test instance  $\mathbf{x}_i$  and  $\mathbf{x}_j$  in  $\bar{\mathbf{X}}$ :  $Dist(i, j) = \text{cosine}(\mathbf{x}_i, \mathbf{x}_j)$ . Based on the distance matrix  $Dist$ , we  
 203 construct a  $k$ -NN Graph  $\mathcal{G}$ , wherein each sample is connected to its top- $k$  most similar samples. The  
 204 connection is represented by an adjacency matrix  $\mathbf{A} \in \mathcal{R}^{N \times N}$ , where  $N$  is the number of sample in  $\bar{\mathbf{X}}$ .  
 205 The entry  $\mathbf{A}_{ij}$  equals 1 if node  $j$  is within the  $k$  nearest neighbors of node  $i$ , and 0 otherwise. The  
 206 edge weight matrix of the similarity graph is denoted as  $\mathbf{Edge}$ , wherein each edge weight in  $\mathbf{Edge}$ , if  
 207 exists, is inversely proportional to the corresponding distance  $Dist$ :

$$\mathbf{Edge}_{ij} = \begin{cases} 1/Dist(i, j) & \mathbf{A}_{ij} = 1. \\ 0 & \mathbf{A}_{ij} = 0. \end{cases} \quad i, j \in \{0, \dots, N - 1\}. \quad (3)$$

208 This means that the connection between two nodes, if exists, is weaker if their proximity is large.

| Dataset  | # Class | Size | Official Train/Test/Extra Split | Our Split(TC/DC/HO) | Model Architecture | Model Acc. On HO set(%) (A/B/C) |
|----------|---------|------|---------------------------------|---------------------|--------------------|---------------------------------|
| CIFAR-10 | 10      | 60K  | 50K/10K/x                       | 20K/39K/1K          | ResNet-18          | 70.1/66.4/68.3                  |
| SVHN     | 10      | 630K | 73K/26K/531K                    | 50K/49K/531K        | Wide-ResNet        | 94.2/92.5/81.6                  |
| STL10    | 10      | 13K  | 5K/8K/x                         | 5K/7.5K/0.5K        | ResNet-34          | 54.8/54.0/53.6                  |

Table 1: The Dataset and DL Models.

Constructing such a  $k$ -NN graph is, however, computationally expensive. This is because, calculating the distance between each pair of test instances requires a computational complexity of  $O(N^2)$ , which is prohibitive to scale up to the current massive unlabeled test instances in real applications. Therefore, we propose an approximation method for  $k$ -NN graph construction. Our intuition is that, since the target of graph construction is to exploit the failure patterns of the nearby labeled instances for the unlabeled instances, the connections between unlabeled data are less meaningful. Therefore, we propose to only consider the connections among labeled data  $\mathbf{X}_L$ , and the connections between labeled  $\mathbf{X}_L$  to unlabeled data  $\mathbf{X}_U$ . This approximation reduces the cost from  $O(N^2)$  to  $O(P^2 + PQ)$ , where  $P$  and  $Q$  stand for the number of data in  $\mathbf{X}_L$  and  $\mathbf{X}_U$ , respectively. Usually, in the real-world scenario,  $P$  is much smaller than  $Q$ , thereby we could obtain a near-linear graph construction algorithm with complexity  $O(PQ)$ .

**GNN-based representation Learning (Line 3-12).** To apply the GNN algorithm, we first initialize the input node representation matrix  $\mathbf{H}^0$  in the similarity graph  $\mathcal{G}$  as  $\bar{\mathbf{X}}$ . Recall that in each GNN layer, the node representations are propagated between neighbors and aggregated together. Thus, we can obtain the representation in the next GNN layer by:

$$\mathbf{H}^{l+1} = \sigma(\tilde{\mathbf{D}}^{-\frac{1}{2}} \tilde{\mathbf{A}} \tilde{\mathbf{D}}^{-\frac{1}{2}} \mathbf{H}^l \Theta^l), \quad (4)$$

where  $\tilde{\mathbf{A}} = \mathbf{Edge} + \mathbf{I}_N$ ,  $\mathbf{I}_N$  is the identity matrix,  $\tilde{\mathbf{D}} = \sum_j \tilde{\mathbf{A}}_{i,j}$ ,  $\Theta^l$  is the trainable weight matrix for the  $l^{th}$  layer,  $\sigma$  is an activation function and  $\mathbf{H}^{l+1}$  is the output representation matrix. The propagation and aggregation are repeated for  $M$  layers, with the output dimension of the  $M_{th}$  layer is 1 (for binary classification purpose).

Then, for any labeled node  $\mathbf{x}_e \in \bar{\mathbf{X}}_L$ , we could obtain a cross entropy loss between the GNN output  $h^M$  and the expected label  $y \in \mathbf{Y}_L$  (e.g. misclassified or not):  $\mathcal{L}_{ce} = -(y \log(h^M) + (1 - y) \log(1 - h^M))$ , where  $h^M$  denotes probability that  $\mathbf{x}_e$  is misclassified. The model is trained via minimizing the loss for some training epochs (we set it as 600 in our experiment). After that, we apply the trained GNN model (except the last layer) on  $\mathbf{X}_U$  to obtain the  $\bar{\mathbf{E}}_c$  (line 12). In this way, the correctness of the neighboring samples could be effectively summarized for each node.

### 3.4 Failure-revealing Capability Estimation

To properly combine both the intrinsic attributes  $\mathbf{e}_m$  and contextual attributes  $\mathbf{e}_c$  for collaborative failure-revealing capability estimation, we formulate the combination function as a simple binary classifier (e.g. a MLP). Specifically, the input to the MLP is a concatenation of  $\mathbf{e}_m$  and  $\mathbf{e}_c$ , and the output is the failure-revealing estimation for an test instance. The final failure-revealing probability is produced by applying a *sigmoid* function  $S(t) = \frac{1}{1+e^{-t}}$  on the MLP model’s output. We use the labeled instances ( $\mathbf{X}_L, \mathbf{Y}_L$ ) to train the MLP in a supervised manner, with an objective of minimizing the binary Cross-Entropy loss. After training, the MLP shall re-weight the importance of intrinsic and contextual attributes and make a final decision by assigning a high probability to a test instance if it is likely to reveal a failure.

Finally, we rank the unlabeled test instances in a descending order based on their failure-revealing capability. Under the given budget, we select the top ones to label and test.

## 4 Experiment

### 4.1 Setup

**Datasets.** We evaluate the performance of TestRank on three popular image classification datasets: CIFAR-10 [15], SVHN [17], and STL10 [4], as shown in Table 1. More elaboration is shown in the Appendix.

There are mainly two parties involved in the model construction process: the training center and the debugging center. Hence, we manually split the dataset into the training center dataset (see the *TC* column in Table 1) and the debugging center dataset (see the *DC* column in Table 1). To mimic the practical scenario where the unlabeled data is abundant, we move a portion of training data to the debugging center to create this scenario. In the debugging center, we let a set of test data as labeled ones to represent the historical test oracles, and they are 8K/10K/1.5K for CIFAR-10, SVHN, and STL10, respectively, which are used to train the GNN and MLP model. The rest of the data in the debugging center are left unlabeled. Also, we spare a hold-out dataset (see the *HO* column), which is used for evaluating the model accuracy.

**Target DL model (model under test).** As shown in Table 1, we use the popular ResNet and WideResNet architectures as the backbone models [10, 22]. To simulate models of different qualities, for each dataset, we train three DL models with different randomly drawn sub-sets from the training set owned by the training center. For model B and C, the training set are drawn with in-equivalent class weights. After training, we report the accuracy of models on the debugging center’s hold-out dataset  $T_{HO}$  in Table 1.

**Evaluation metric.** We propose a new evaluation metric for test prioritization techniques: Test Relative Coverage (*TRC*). *TRC* is defined as the number of detected failures divided by the number of budget or the number of total failures identified by the whole unlabeled test set, whichever is minimal:

$$TRC = \frac{\#Detected\ Failures}{\min(\#Budget, \#Total\ Failures)}. \quad (5)$$

When  $\# \text{ budget} \leq \# \text{ total failures}$ , the maximum number of failures can be identified by a test prioritization technique equals to the budget. When  $\# \text{ budget} \geq \# \text{ total failures}$ , the maximum number of failures can be detected equals to the total number of failures. Therefore, *TRC* measures how far a test prioritization technique is to the ideal case.

In practice, under the massive unlabeled data, the performance under a small budget is considered more important than that under a large budget. To provide an insight on the quality of one test prioritization technique under a small budget, we also provide an *ATRC* metric: *ATRC* measures the average *TRC* values for budget values less than the total failures:

$$ATRC = \frac{1}{N} \sum_i^{N-1} TRC_i, \quad (6)$$

where  $TRC_i$  stands for the *TRC* value under budget  $b_i$ ,  $b_i \neq b_j$ , and  $b_i \leq \text{number of total failures}$ .

The proposed metrics enhance the ones used by Feng *et. al.* [6] and Byun *et. al.* [2]. They use the percentage of detected failures against the percentage of budget (and an APFD [5] value derived based on it) for evaluation. Their metric would produce a small value under a small budget, regardless of how good the prioritization technique is. For example, we assume that there are 10,000 unlabeled data, and 2,000 of them can detect model failures. If the budget is 100, the best percentage of detected failures is 5%, and the worst is 0%. Thus, under their metric, the gap between the best and the worst is only 5%. By contrast, *TRC* enlarges this gap to 100% to better differentiate the ability of different test prioritization techniques.

## 4.2 Comparison of TestRank with Baselines

We evaluate *TestRank* against five representative baselines: Random, DeepGini [6] (the state-of-the-art), MCP [20], DSA [13], and Dropout-uncertainty [2]. The details of each baseline are illustrated in the Appendix. For the dropout uncertainty method, we run 1000 times inferences with a default dropout rate of 0.5 (the dropout rate is consistent with the one used in [2]). For the DSA method, we collect the activation traces of the final convolution layer to calculate the surprise score. For our method, we set the number of neighbors for constructing the kNN graph as 100. Also, we use a two-layer GNN with a hidden dimension of 32. More ablation studies are in Section 4.3.

Table 2 compares *TestRank* with baselines using the *ATRC* metric. From this table, we have several observations. First, compared with the baselines, *TestRank* can achieve the highest *ATRC* values on all evaluated datasets and models. For instance, on CIFAR-10, *TestRank* can achieve 9.09%, 20.07%, 14.38% higher *ATRC* values than the best baseline DeepGini for model A, B, C, respectively.

| Dataset  | Model ID | Random | MCP   | DSA   | Uncertainty | DeepGini | TestRank<br>Contextual-Only | TestRank     |
|----------|----------|--------|-------|-------|-------------|----------|-----------------------------|--------------|
| CIFAR-10 | A        | 30.15  | 58.25 | 60.93 | 58.09       | 67.47    | 51.39                       | <b>76.56</b> |
|          | B        | 34.18  | 46.46 | 62.34 | 61.85       | 67.80    | 58.85                       | <b>87.87</b> |
|          | C        | 34.27  | 65.25 | 64.47 | 63.10       | 71.15    | 75.33                       | <b>85.53</b> |
| SVHN     | A        | 10.16  | 39.98 | 55.47 | 58.29       | 63.47    | 44.16                       | <b>66.06</b> |
|          | B        | 11.85  | 38.07 | 57.96 | 58.06       | 63.85    | 51.26                       | <b>76.36</b> |
|          | C        | 23.41  | 65.33 | 69.34 | 71.80       | 81.68    | 93.99                       | <b>95.32</b> |
| STL10    | A        | 39.25  | 66.62 | 64.56 | 64.30       | 69.70    | 60.09                       | <b>79.00</b> |
|          | B        | 42.60  | 69.97 | 67.12 | 65.30       | 72.89    | 71.90                       | <b>80.96</b> |
|          | C        | 46.05  | 71.88 | 66.60 | 70.34       | 73.34    | 79.55                       | <b>88.67</b> |

Table 2: Comparison of *TextRank* with baseline methods with ATRC values (%).

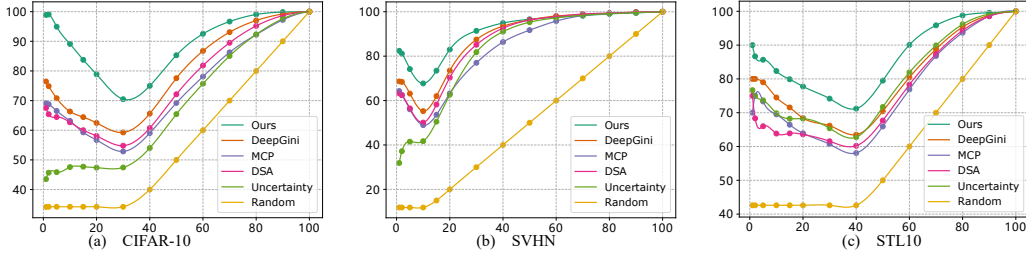

Figure 3: The TRC values against all budgets. X-axis: the budget (%). Y-axis: the TRC value. Note: this figure is generated with model B on each dataset.

Therefore, our method can distinguish the failure-revealing capability of the unlabeled test inputs much more accurately. Second, the *TextRank-Contextual-Only* column shows the result using only the contextual attributes. We observe that the contextual attributes alone can achieve higher effectiveness than random prioritization. For example, for model A on CIFAR-10, the effectiveness of random prioritization is 30.15% while that of the context-only method is 51.39%. We manually check the distribution of failures of model C and find that many failures are centralized on two classes, where the training data is insufficient. This kind of failure is easily detected by the contextual attributes-based method. Hence, the contextual information is helpful. But still, the context attributes alone are not sufficient. The combination of intrinsic and contextual attributes is essential in achieving high accuracy failure-revealing capability estimation.

To show more detailed results, we present the TRC value against every labeling budget in Figure 3. We observe that the TRC values for most curves decrease in the beginning and then increase. The turning point is when # budget = # total failures. When # budget < # total failures, the TRC values decrease because we rank the test instances according to their failure-revealing probabilities. With the budget increases, the selected test cases have a lower average failure-revealing ability, thus the decreased TRC value. When # budget > # total failures, according to the definition of TRC (see Equation 5), the denominator is fixed. Since the increase in budget will increase the number of detected failures, the TRC value will increase.

Figure 3 shows that our method consistently outperforms baselines, especially when the budget is small. For example, in Figure 3 (a), *TextRank* improves the prioritization efficiency by around 20% compared to the best baseline when the budget is around 1%. When the budget is rather high (e.g. budget  $\geq 80\%$ ), the difference between different methods is less obvious because most failures can be selected under the large budget.

### 4.3 Influence of TestRank Configurations

**Feature Extractor.** *TextRank* uses an unsupervised BYOL model trained on both labeled and unlabeled data to extract their features. One may wonder if it can be replaced by a supervised model (e.g., the target DL model). To investigate this, we replace the feature extractor in *TextRank* with the front layers (we remove the last few linear layers) of the target DL model. The result is shown in the *TextRank-TargetModel* column in Table 3. Comparing with the original *TextRank*, the average ATRC value on the reported datasets and models reduces by 6.23%, which is significant. As the quality



| Dataset               | Model | TestRank (%) | TestRank w/o approx. (%) | TestRank TargetModel (%) |
|-----------------------|-------|--------------|--------------------------|--------------------------|
| CIFAR-10              | A     | 76.56        | 77.77 (+1.21)            | 68.84 (-7.71)            |
|                       | B     | 87.87        | 87.70 (-0.17)            | 81.46 (-6.40)            |
|                       | C     | 85.53        | 88.10 (+2.57)            | 77.73 (-7.79)            |
| SVHN                  | A     | 66.06        | 63.87 (-2.19)            | -                        |
|                       | B     | 76.36        | 82.04 (+5.68)            | -                        |
|                       | C     | 95.32        | 96.62 (+1.30)            | -                        |
| STL10                 | A     | 79.00        | 80.50 (+1.50)            | 67.59 (-11.40)           |
|                       | B     | 80.96        | 78.98 (-1.98)            | 74.43 (-6.52)            |
|                       | C     | 88.67        | 89.32 (+0.65)            | 72.43 (-16.23)           |
| Average Influence (%) |       |              | <b>+0.95</b>             | <b>-6.23</b>             |

Table 3: The performance (ATRC values) of TestRank under different configurations.

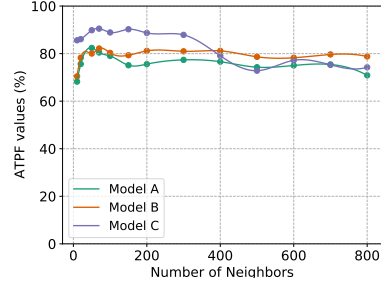

Figure 4: The impact of the number of neighbors  $k$  (STL10 dataset).

of the given model is to be examined, its feature extraction performance may not be reliable. Also, the dimension of the hidden layer could be huge, making it computationally expensive to calculate similarity values between input samples (This is why we do not report results on the SVHN dataset). In contrast, the separate model is more controllable, enabling it to extract better features for these data. Hence, using a separate feature extractor is necessary.

**$k$ -NN graph approximation.** To reduce the computation complexity, TextRank uses approximation techniques when constructing the  $k$ -NN graph (see Section 3.3). The *TextRank-w/o-approx.* column in Table 3 shows the result when we use the original  $k$ -NN graph without approximation. It indicates that the average influence of the approximation is small (e.g. 0.95%). Therefore, if there is a computation resource limit and the unlabeled test instances are massive, we recommend using the approximation to save computation with negligible performance loss greatly.

**Number of nearest neighbors  $k$ .** When constructing the  $k$ -NN graph, the number of neighbors  $k$  decides the range of the context one node can reach. In previous experiments, the  $k$  is set to 100. We enlarge this range to (20 - 800) to study the influence. The result is shown in Figure 4.3. One can observe that the prioritization effectiveness will decrease when  $k$  is too small or too large. When  $k$  is too small, the context information available to one instance is limited, making it difficult for the GNN to extract valuable contextual attributes. On the other hand, when  $k$  is too large, the GNN may grasp irrelevant/noisy information. Still, TextRank can achieve good performance in a wide range of  $k$  values. For example, for model A, TextRank is better than the best baseline 69.70% (see Table 2) when  $k$  is larger than 20. Hence, selecting the number of nearest neighbors  $k$  is relatively flexible.

## 5 Conclusion and Future Work

We propose *TestRank*, a novel test prioritization framework for DL models. To estimate a test instance’s failure-revealing capability, *TestRank* not only leverages the intrinsic attributes of an input instance obtained from the target DL model, but also extracts the contextual attributes from the DL model’s historical inputs and responses. Our empirical results show that *TestRank* can capture the failure-revealing capabilities of unlabeled test instances more accurately than existing solutions.

This paper considers each test case equally and aims to identify as many failure-revealing test cases as possible. In practice, the impact of each test case could be different. We leave the study of such impact for future work. Besides, the current *TestRank* solution only supports CNN-based classification tasks, and we plan to extend it to other tasks with different DL models (e.g., RNN and GNN models) in the future.

## References

- [1] Christopher M Bishop. *Pattern recognition and machine learning*. springer, 2006.
- [2] Taejoon Byun, Vaibhav Sharma, Abhishek Vijayakumar, Sanjai Rayadurgam, and Darren D. Cofer. Input prioritization for testing neural networks. In *AITest*, pages 63–70. IEEE, 2019.
- [3] Ting Chen, Simon Kornblith, Mohammad Norouzi, and Geoffrey Hinton. A simple framework for contrastive learning of visual representations. In *International conference on machine learning*, pages 1597–1607. PMLR, 2020.
- [4] A. Coates, A. Ng, and H. Lee. An analysis of single-layer networks in unsupervised feature learning. In *AISTATS*, 2011.
- [5] H. Do and G. Rothermel. On the use of mutation faults in empirical assessments of test case prioritization techniques. *IEEE Transactions on Software Engineering*, 2006.
- [6] Yang Feng, Qingkai Shi, Xinyu Gao, Jun Wan, Chunrong Fang, and Zhenyu Chen. Deepgini: Prioritizing massive tests to enhance the robustness of deep neural networks. *ISSTA 2020*, 2020. ISBN 9781450380089. doi: 10.1145/3395363.3397357.
- [7] M. Fey and J. E. Lenssen. Fast graph representation learning with pytorch geometric. *ArXiv*, abs/1903.02428, 2019.
- [8] Yarin Gal and Zoubin Ghahramani. Dropout as a bayesian approximation: Representing model uncertainty in deep learning. In *ICML*, volume 48 of *JMLR Workshop and Conference Proceedings*, pages 1050–1059. JMLR.org, 2016.
- [9] Jean-Bastien Grill, Florian Strub, Florent Altché, Corentin Tallec, Pierre Richemond, Elena Buchatskaya, Carl Doersch, Bernardo Avila Pires, Zhaohan Guo, Mohammad Gheshlaghi Azar, Bilal Piot, koray kavukcuoglu, Remi Munos, and Michal Valko. Bootstrap your own latent - a new approach to self-supervised learning. In *Advances in Neural Information Processing Systems*, volume 33, pages 21271–21284, 2020.
- [10] Kaiming He, X. Zhang, Shaoqing Ren, and Jian Sun. Deep residual learning for image recognition. *IEEE Conference on Computer Vision and Pattern Recognition (CVPR)*, 2016.
- [11] Kaiming He, Haoqi Fan, Yuxin Wu, Saining Xie, and Ross Girshick. Momentum contrast for unsupervised visual representation learning. In *Proceedings of the IEEE/CVF Conference on Computer Vision and Pattern Recognition*, pages 9729–9738, 2020.
- [12] Jinhan Kim, Robert Feldt, and Shin Yoo. Guiding deep learning system testing using surprise adequacy. *IEEE/ACM 41st International Conference on Software Engineering (ICSE)*, 2019.
- [13] Jinhan Kim, Robert Feldt, and Shin Yoo. Guiding deep learning system testing using surprise adequacy. In *Proceedings of the 41st International Conference on Software Engineering*, ICSE ’19, page 1039–1049. IEEE Press, 2019. doi: 10.1109/ICSE.2019.00108. URL <https://doi.org/10.1109/ICSE.2019.00108>.
- [14] Thomas N. Kipf and Max Welling. Semi-supervised classification with graph convolutional networks. In *ICLR (Poster)*. OpenReview.net, 2017.
- [15] Alex Krizhevsky, Geoffrey Hinton, et al. Learning multiple layers of features from tiny images. Technical report, Citeseer, 2009.
- [16] Radford M Neal. *Bayesian learning for neural networks*, volume 118. Springer Science & Business Media, 2012.
- [17] Yuval Netzer, T. Wang, A. Coates, A. Bissacco, B. Wu, and A. Ng. Reading digits in natural images with unsupervised feature learning. 2011.
- [18] Adam Paszke, Sam Gross, Francisco Massa, Adam Lerer, James Bradbury, Gregory Chanan, Trevor Killeen, Zeming Lin, Natalia Gimelshein, Luca Antiga, et al. Pytorch: An imperative style, high-performance deep learning library. *arXiv preprint arXiv:1912.01703*, 2019.

- 405 [19] Michael D Richard and Richard P Lippmann. Neural network classifiers estimate bayesian a  
406 posteriori probabilities. *Neural computation*, 3(4):461–483, 1991.
- 407 [20] W. Shen, Y. Li, L. Chen, Y. Han, Y. Zhou, and B. Xu. Multiple-boundary clustering and  
408 prioritization to promote neural network retraining. In *2020 35th IEEE/ACM International*  
409 *Conference on Automated Software Engineering (ASE)*, 2020.
- 410 [21] Aäron van den Oord, Yazhe Li, and Oriol Vinyals. Representation learning with contrastive  
411 predictive coding. *CoRR*, abs/1807.03748, 2018.
- 412 [22] Sergey Zagoruyko and Nikos Komodakis. Wide residual networks. In *BMVC*, 2016.

## Checklist

### 1. For all authors...

- (a) Do the main claims made in the abstract and introduction accurately reflect the paper's contributions and scope? [\[Yes\]](#)
- (b) Did you describe the limitations of your work? [\[Yes\]](#) Please refer to the second paragraph in Section 5 for details.
- (c) Did you discuss any potential negative societal impacts of your work? [\[Yes\]](#) See the Appendix for details.
- (d) Have you read the ethics review guidelines and ensured that your paper conforms to them? [\[Yes\]](#)

### 2. If you are including theoretical results...

- (a) Did you state the full set of assumptions of all theoretical results? [\[N/A\]](#)
- (b) Did you include complete proofs of all theoretical results? [\[N/A\]](#)

### 3. If you ran experiments...

- (a) Did you include the code, data, and instructions needed to reproduce the main experimental results (either in the supplemental material or as a URL)? [\[Yes\]](#) See supplementary for details.
- (b) Did you specify all the training details (e.g., data splits, hyperparameters, how they were chosen)? [\[Yes\]](#) Please see Section 4 for details.
- (c) Did you report error bars (e.g., with respect to the random seed after running experiments multiple times)? [\[No\]](#) Because the baselines we compare do not report this as well.
- (d) Did you include the total amount of compute and the type of resources used (e.g., type of GPUs, internal cluster, or cloud provider)? [\[Yes\]](#) Please refer to the first paragraph in Section 4.

### 4. If you are using existing assets (e.g., code, data, models) or curating/releasing new assets...

- (a) If your work uses existing assets, did you cite the creators? [\[Yes\]](#) Please refer to the Experimental Section (Section 4) for details.
- (b) Did you mention the license of the assets? [\[Yes\]](#) Please refer to the Appendix for details.
- (c) Did you include any new assets either in the supplemental material or as a URL? [\[Yes\]](#) See the supplemental material for details.
- (d) Did you discuss whether and how consent was obtained from people whose data you're using/curating? [\[Yes\]](#) Please see the Appendix for details.
- (e) Did you discuss whether the data you are using/curating contains personally identifiable information or offensive content? [\[Yes\]](#) Please see the Appendix for details.

### 5. If you used crowdsourcing or conducted research with human subjects...

- (a) Did you include the full text of instructions given to participants and screenshots, if applicable? [\[N/A\]](#)
- (b) Did you describe any potential participant risks, with links to Institutional Review Board (IRB) approvals, if applicable? [\[N/A\]](#)
- (c) Did you include the estimated hourly wage paid to participants and the total amount spent on participant compensation? [\[N/A\]](#)

## 456 A Appendix

### 457 A.1 Experiment details

458 Our code is implemented with the open-source PyTorch (under BSD license) [18] and PyG (under  
459 MIT license) [7] ML libraries. All of our experiments are performed on a single TITAN V GPU <sup>1</sup>.

#### 460 A.1.1 Datasets

461 CIFAR-10 is officially composed of 50,000 training images and 10,000 test images, and it has ten  
462 classes of natural images. The Street View House Numbers (SVHN) dataset contains house numbers  
463 from Google Street View images. It contains 73,257 training images and 26,032 testing images.  
464 Besides, the SVHN dataset also has an extra set of 531,131 images. The STL10 dataset contains ten  
465 classes of natural images. In each class, there are 500 training images and 800 test images.

466 Please note that the datasets we used are open-sourced and available for research purposes <sup>2 3 4</sup>.  
467 Also, since the data we used is about numbers and the animals, we assume there are no personally  
468 identifiable information or offensive content.

#### 469 A.1.2 Baselines

470 Given a DL model and a certain budget, the goal of our method is to select test cases from an  
471 unlabeled data pool to discover the failures of the given DL model. We compare our work with the  
472 following representative test prioritization techniques:

- 473 • **DeepGini [6]:** DeepGini is the state-of-art test case selection technique. DeepGini ranks  
474 unlabeled test cases by a score defined based on the output confidence (See Equation 2).
- 475 • **MCP [20]:** In addition to the output confidence, MCP also considers the balance among  
476 different class boundaries of the selected test inputs. Specifically, MCP groups test cases  
477 into different clusters, where each cluster stands for a distinct classification boundary, and  
478 try to equally choose low confidence test cases from each cluster.
- 479 • **DSA [2]:** Byun *et. al.* propose to use the distance-based surprise score (DSA) as a test  
480 prioritization metric, which is originally proposed in [12]. The surprise score measures the  
481 distance between the test case to the training set. Samples with higher surprise scores are  
482 prioritized.
- 483 • **Uncertainty [2]:** By running the model multiple times (e.g.  $t$  times) with a certain dropout  
484 rate, the uncertainty is calculated as the entropy on the averaged output probabilities.
- 485 • **Random:** Test inputs are randomly drawn from all unlabeled samples.

### 486 A.2 Limitation

487 Besides the number of detected failures, failure diversity is another important factor for model  
488 debugging. In this work, we have the implicit assumption that the historical labeled data can cover the  
489 input distribution, and under such circumstances, TestRank can prioritize unlabeled tests effectively.  
490 If, however, the historical test data is severely biased, before prioritizing tests with TestRank, we  
491 should analyze the test pool and try to fill this gap first. Otherwise, the detected failures are lack of  
492 diversity. We shall consider this problem in our future research.

### 493 A.3 Broader Impacts

494 This work targets on building an efficient and effective test prioritization technique for deep learning  
495 models, which can help ensure the security of deep learning models after deployment. A variety of  
496 safety-critical tasks, such as autonomous vehicles, industrial robotics, and medical diagnosis, can  
497 benefit from such test prioritization technique. We consider the scenario in which the unlabeled data

---

<sup>1</sup><https://www.nvidia.com/en-us/titan/titan-v/>

<sup>2</sup><http://ufldl.stanford.edu/housenumbers/>

<sup>3</sup><https://cs.stanford.edu/acoates/stl10/>

<sup>4</sup><https://www.cs.toronto.edu/~kriz/cifar.html>

498 is abundant and a subset of unlabeled data is selected for labeling and testing. While building the  
499 unlabeled data by collecting them from the Internet or other sources, it may have a chance to include  
500 some unauthorized or private data. Also, the collected unlabeled data could be biased, resulting in the  
501 testing being incomplete. To avoid such cases, we should always guarantee that the collected data  
502 will not violate any kind of privacy or rights, and should also ensure that the collected data cover  
503 instances as many as possible.
